# Supplementary material
Source: MDPI journal article supplement (https://www.mdpi.com/1424-2818/13/2/85)
Supplement: s1 [file s1]

## Supplementary Materials

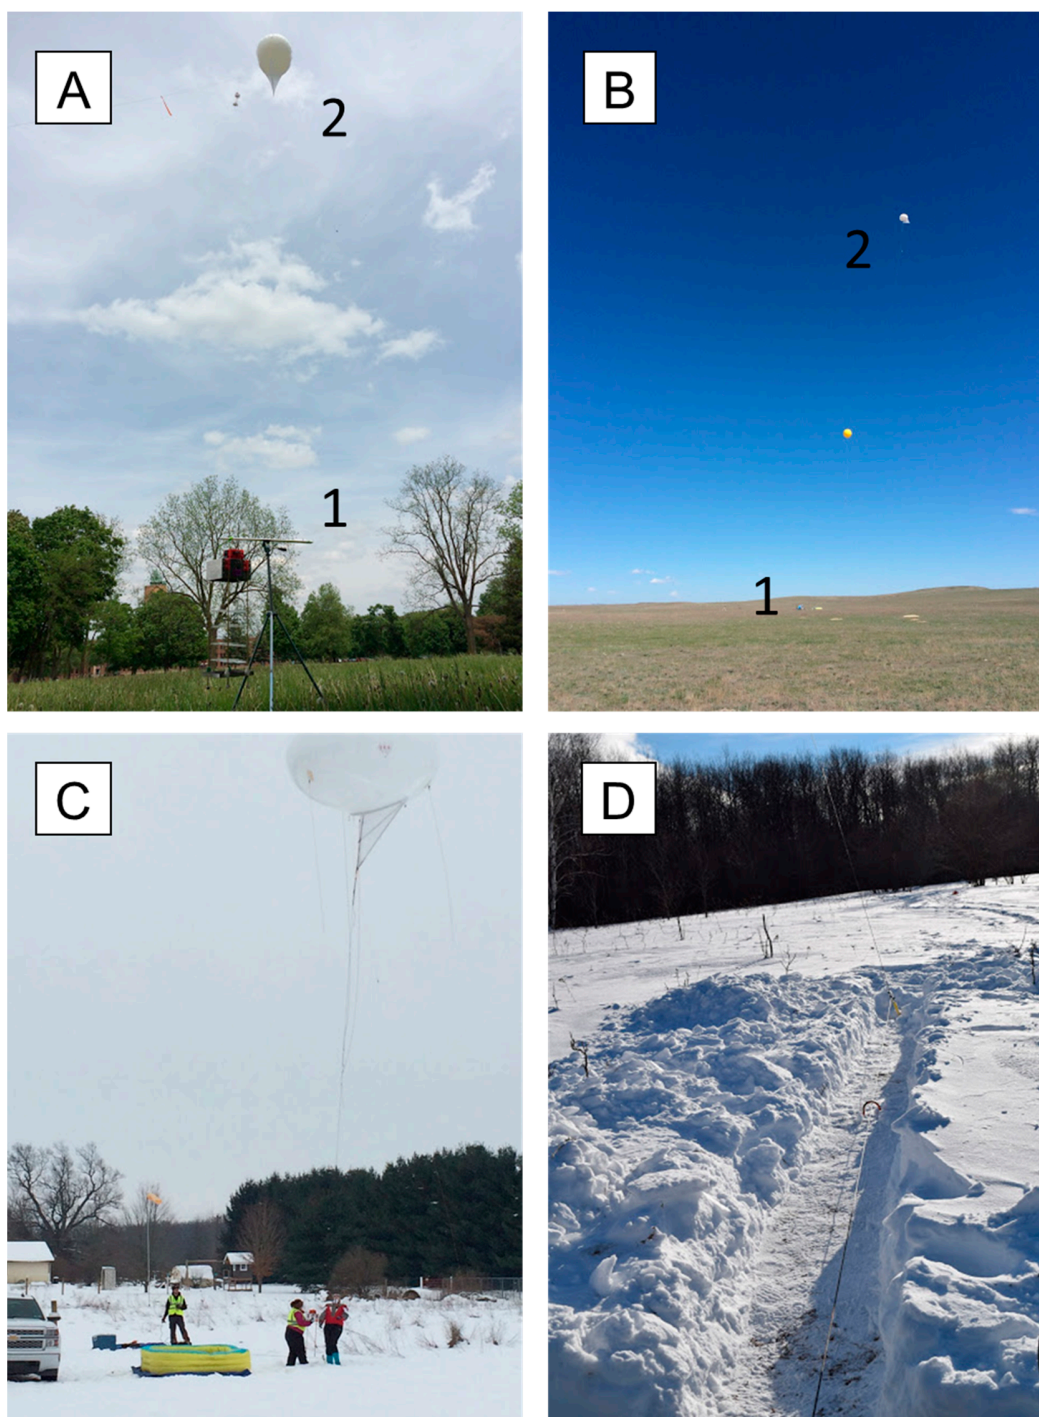

**Figure S1.** Example images of sampling with tethered helikites. Near view (A) and far view (B) showing 1) an example of near-surface samplers during testing while hanging from tripods, within 2 m of the ground, and 2) an example of a high-altitude sampler suspended beneath helikite, reaching 150 m above the ground. One of each sample was collected at each of the three sites in the agricultural/developed and forested/undeveloped locations. Images C and D were taken during the 2016/2017 sampling effort and demonstrate the complexity of collecting samples in winter using a tethered helikite

## Supplementary Materials

**Table S1.** Land cover from individual sites. Sampling date, site location and land use information for forested/undeveloped sites near Pellston, Michigan, USA, and agricultural/developed sites near Kalamazoo, Michigan, USA. Percent land cover was calculated for a 10,000-m diameter surrounding each site.

| Site Name            | Date of Sampling | GPS coordinates       | % Forest | % Developed | % Agriculture | % Wetland | % Open Water | Other |
|----------------------|------------------|-----------------------|----------|-------------|---------------|-----------|--------------|-------|
| <b>UNDEVELOPED</b>   |                  |                       |          |             |               |           |              |       |
| UMBS field           | 1/13/2017        | 45.561611, -84.679694 | 24.9     | 6.7         | 28.2          | 25.1      | 0.2          | 14.9  |
| Robinson Road        | 1/13/2017        | 45.55047, -84.72366   | 36.1     | 6.1         | 10.7          | 20.8      | 17.1         | 9.2   |
| Chickagami Trail     | 1/14/2017        | 45.483417, -84.689483 | 33.7     | 8.5         | 8.2           | 9.9       | 30.7         | 9.0   |
| Average              |                  |                       | 31.6     | 7.1         | 15.7          | 18.6      | 16.0         | 11.0  |
| <b>DEVELOPED</b>     |                  |                       |          |             |               |           |              |       |
| Parkview Campus      | 12/23/16         | 42.255917, -85.637150 | 21.5     | 55.6        | 15.0          | 2.6       | 1.6          | 3.7   |
| Asylum Lake Preserve | 12/23/2016       | 42.264083, -85.612233 | 19.3     | 43.3        | 25.3          | 8.3       | 2.1          | 1.7   |
| Schoolcraft Airstrip | 12/23/2016       | 42.178200, -85.669040 | 19.5     | 27.9        | 37.5          | 9.4       | 3.6          | 2.2   |
| Average              |                  |                       | 20.1     | 42.3        | 25.9          | 6.8       | 2.4          | 2.5   |

**Table S2.** Land cover from air mass trajectories. Backwards trajectories for air masses sampled in each sampling effort were calculated using the National Oceanic and Atmospheric Administration (NOAA) Hybrid Single-Particle Lagrangian Integrated Trajectory (HYSPLIT). Percent land cover was calculated for a 10,000-m buffer surrounding each trajectory. A map of these trajectories are shown Figure 1C.

| Location    | Altitude (m) | % Forest | % Developed | % Agriculture | % Wetland | % Open Water | % Other |
|-------------|--------------|----------|-------------|---------------|-----------|--------------|---------|
| Undeveloped | 2            | 15.3     | 2.6         | 4.6           | 13.3      | 59.7         | 4.6     |
|             | 150          | 20.2     | 2.9         | 4.2           | 19.4      | 47.9         | 5.5     |
| Developed   | 2            | 10.0     | 15.5        | 60.3          | 9.9       | 2.8          | 1.5     |
|             | 150          | 11.8     | 11.5        | 67.3          | 5.6       | 2.3          | 1.4     |

**Table S3.** Arduino atmospheric data. Arduino sensors attached to sampling boxes recorded temperature, pressure and humidity data, as described in Spring et al. (2018). NR indicates that data were not recorded for that sampler.

| 2m              |                  |          |              |                   |                 | 150m                |          |              |                   |                 |
|-----------------|------------------|----------|--------------|-------------------|-----------------|---------------------|----------|--------------|-------------------|-----------------|
| Site Name       | Time of sampling | Hou<br>r | Temp<br>(°C) | Pressure<br>(kPa) | Humidity<br>(%) | Time of<br>Sampling | Hou<br>r | Temp<br>(°C) | Pressure<br>(kPa) | Humidity<br>(%) |
| Parkview Campus | 10:15 - 4:30     | 1        | 1.211        | 99.269            | 70.623          | NR                  | 1        | NR           | NR                | NR              |
|                 |                  | 2        | 1.987        | 99.213            | 72.011          |                     | 2        | NR           | NR                | NR              |
|                 |                  | 3        | 2.362        | 99.102            | 72.953          |                     | 3        | NR           | NR                | NR              |
|                 |                  | 4        | 3.072        | 98.982            | 71.073          |                     | 4        | NR           | NR                | NR              |
|                 |                  | 5        | 2.596        | 98.863            | 73.722          |                     | 5        | NR           | NR                | NR              |
|                 |                  | 6        | 2.437        | 98.734            | 74.258          |                     | 6        | NR           | NR                | NR              |

# Supplementary Materials

|                      |              |   |         |         |        |              |   |         |        |        |
|----------------------|--------------|---|---------|---------|--------|--------------|---|---------|--------|--------|
| Asylum Lake Preserve | 9:03 - 3:01  | 1 | -0.654  | 99.291  | 77.551 | 9:02 - 3:00  | 1 | -0.872  | 97.994 | 75.314 |
|                      |              | 2 | 0.553   | 99.256  | 74.235 |              | 2 | -0.947  | 97.878 | 78.864 |
|                      |              | 3 | 1.526   | 99.206  | 74.546 |              | 3 | -0.305  | 97.875 | 80.818 |
|                      |              | 4 | 2.005   | 99.095  | 75.472 |              | 4 | 0.199   | 97.782 | 81.767 |
|                      |              | 5 | 2.599   | 98.975  | 74.444 |              | 5 | 0.545   | 97.52  | 81.392 |
|                      |              | 6 | 2.349   | 98.871  | 76.432 |              | 6 | 0.706   | 97.458 | 81.246 |
| Schoolcraft Airstrip | 11:54 - 5:27 | 1 | 1.721   | 99.109  | 75.702 | NR           | 1 | NR      | NR     | NR     |
|                      |              | 2 | 2.478   | 98.991  | 75.049 |              | 2 | NR      | NR     | NR     |
|                      |              | 3 | 2.51    | 98.889  | 76.666 |              | 3 | NR      | NR     | NR     |
|                      |              | 4 | 2.466   | 98.727  | 76.593 |              | 4 | NR      | NR     | NR     |
|                      |              | 5 | 2.122   | 98.648  | 78.47  |              | 5 | NR      | NR     | NR     |
|                      |              | 6 | 1.943   | 98.54   | 79.595 |              | 6 | NR      | NR     | NR     |
| UMBS field           | 12:31 - 6:31 | 1 | -3.571  | 101.265 | 35.148 | NR           | 1 | NR      | NR     | NR     |
|                      |              | 2 | -5.465  | 101.265 | 40.82  |              | 2 | NR      | NR     | NR     |
|                      |              | 3 | -5.947  | 101.288 | 41.577 |              | 3 | NR      | NR     | NR     |
|                      |              | 4 | -9.285  | 101.354 | 51.361 |              | 4 | NR      | NR     | NR     |
|                      |              | 5 | -11.411 | 101.389 | 60.996 |              | 5 | NR      | NR     | NR     |
|                      |              | 6 | -11.744 | 101.391 | 64.674 |              | 6 | NR      | NR     | NR     |
| Robinson Road        | 10:46 - 4:47 | 1 | -8.384  | 100.899 | 48.03  | 11:12 - 5:13 | 1 | -10.389 | 99.325 | 55.626 |
|                      |              | 2 | -7.956  | 100.878 | 46.578 |              | 2 | -10.355 | 99.455 | 52.899 |
|                      |              | 3 | -7.633  | 100.87  | 46.189 |              | 3 | -10.071 | 99.429 | 51.309 |
|                      |              | 4 | -7.95   | 100.886 | 47.759 |              | 4 | -10.076 | 99.354 | 54.049 |
|                      |              | 5 | -8.919  | 100.94  | 50.352 |              | 5 | -10.487 | 99.204 | 54.304 |
|                      |              | 6 | -9.643  | 100.992 | 54.68  |              | 6 | -11.014 | 99.162 | 57.305 |
| Chickagami Trail     | NR           | 1 | 9.862   | 100.668 | 27.556 | 11:04 - 5:09 | 1 | -5.194  | 99.079 | 69.576 |
|                      |              | 2 | 9.697   | 100.544 | 29.949 |              | 2 | -3.286  | 99.032 | 63.782 |
|                      |              | 3 | NR      | NR      | NR     |              | 3 | -2.219  | 98.952 | 58.685 |
|                      |              | 4 | NR      | NR      | NR     |              | 4 | -2.299  | 98.858 | 57.597 |
|                      |              | 5 | NR      | NR      | NR     |              | 5 | -2.029  | 98.81  | 56.358 |
|                      |              | 6 | NR      | NR      | NR     |              | 6 | -2.527  | 98.827 | 62.642 |

## Supplementary Materials

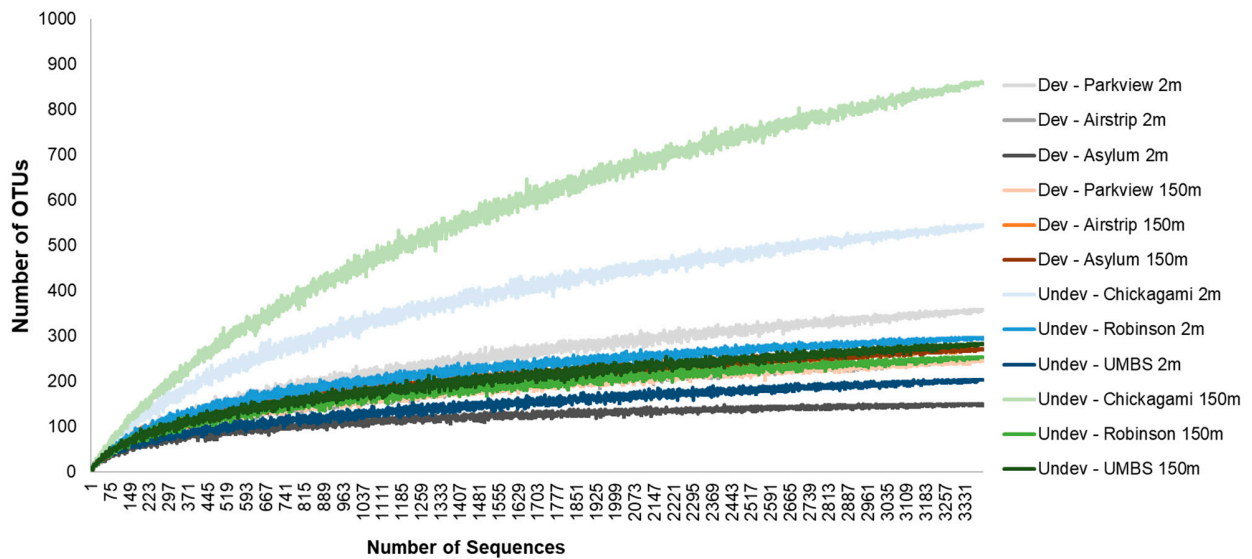

**Figure S2.** Collector's curves. The number of OTUs observed in air samples collected from three developed (Dev) and undeveloped (Undev) sites near surface (2 m) and at higher altitude (150 m).

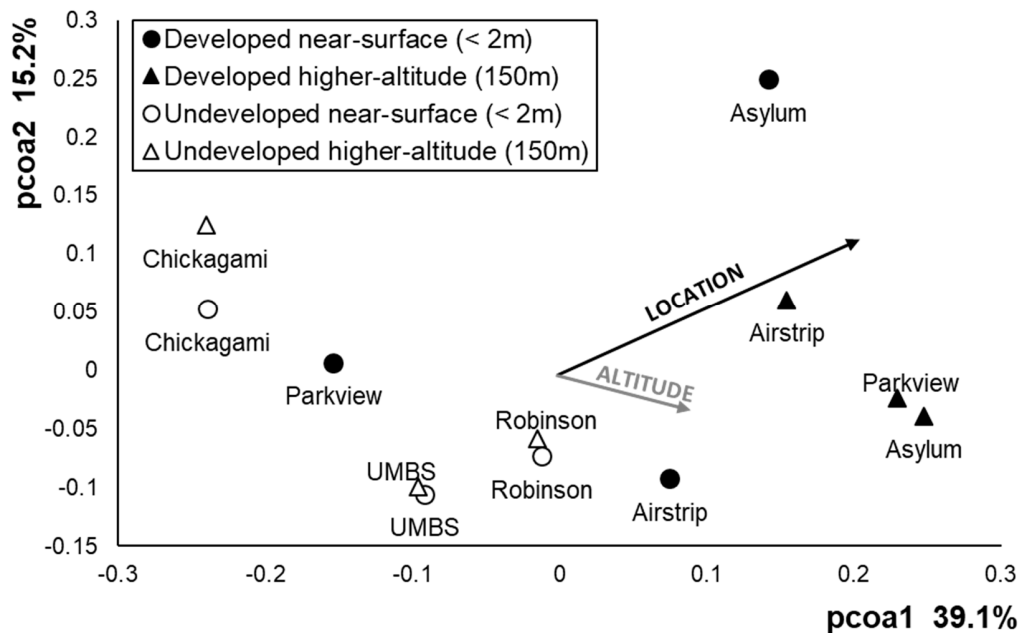

**Figure S3.** Community variation by location and altitude. Principle coordinates analysis using a weighted UniFrac distance matrix to examine community similarity across all twelve air samples. When all samples are examined together, 57% of the variation in airborne communities is explained by the location (black arrow), which varies by land use, air mass sampled and sampling date ( $p = 0.043$ ). Eight percent of the variation is explained by altitude (gray arrow), which was not significant ( $p = 0.701$ ). We note that at the land use level, replicate sites were sampled within the same air mass, so they cannot be treated independently. This figure demonstrates that when considered together, air samples varied by land use/air mass/collection date, as is consistent with the assumptions underlying our hypotheses.
